# Supplementary material for: Plasma assisted design of biocompatible 3D printed PCL/silver nanoparticle scaffolds: in vitro and in vivo analyses
Source: Royal Society of Chemistry journal article supplement (doi:10.1039/d1ma00444a), 2021-01-01
Supplement: d1ma00444a1.pdf [file d1ma00444a1.pdf]

## **Plasma assisted designing of biocompatible 3D printed PCL/silver nanoparticle scaffolds: *In vitro* and *in vivo* analysis**

Neethu Ninan<sup>a,b,\*</sup>, Blessy Joseph<sup>c</sup>, Rahul Madathiparambil Visalakshan<sup>b,a</sup>, Richard Bright<sup>a,b</sup>, Clement Denoual<sup>d</sup>, Peter Zilm<sup>e</sup>, Yogesh Bharat Dalwi<sup>f</sup>, Priya P.V<sup>g</sup>, Aji Mathew<sup>h</sup>, Yves Grohens<sup>d</sup>, Nandakumar Kalarikkal<sup>c</sup>, Krasimir Vasilev<sup>a,b,\*</sup>, Sabu Thomas<sup>c,i,\*</sup>

<sup>a</sup>Academic Unit of STEM, University of South Australia, Mawson Lakes, SA 5095, Australia

<sup>b</sup>Future Industries Institute, University of South Australia, Mawson Lakes, SA 5095, Australia

<sup>c</sup>International and Inter University Centre for Nanoscience and Nanotechnology, Mahatma Gandhi University, Kottayam- 686 560, Kerala, India

<sup>d</sup>University Bretagne Sud, UMR CNRS 6027, IRDL, F-56100, Lorient, France

<sup>e</sup>Adelaide Dental School, University of Adelaide, South Australia, Australia

<sup>f</sup>Pushpagiri Research Centre, Thiruvalla-689101, Kerala, India

<sup>g</sup>Pathology Department, Government Medical College, Kottayam-686008, Kerala, India

<sup>h</sup> Division of Materials and Environmental Chemistry, Stockholm University, Frescativägen 8, 10691, Stockholm, Sweden

<sup>i</sup> School of Energy Studies and School of Chemical Sciences, Mahatma Gandhi University, Kottayam- 686 560, Kerala, India

\*Corresponding authors: sabuthomas@mgu.ac.in

krasimir.vasilev@unisa.edu.au, neethun.ninan@gmail.com

## Supplementary information

### Methods

#### TEM

AgNPs were imaged using a transmission electron microscope (JEOL-2100F, Japan) operating at an accelerating voltage of 200 kV. A droplet of AgNP solution was placed on a carbon-coated copper grid from ProSciTech (Australia) and dried overnight for TEM evaluation.

#### UV

The absorption spectra of AgNP solution were attained using Varian Cary50 BIO UV-Visible Spectrophotometer (Varian Inc. U.S.A).

#### DLS

The hydrodynamic diameter of nanoparticle solution was analyzed using Malvern-Zetasizer Nano ZS.

### Results and discussion

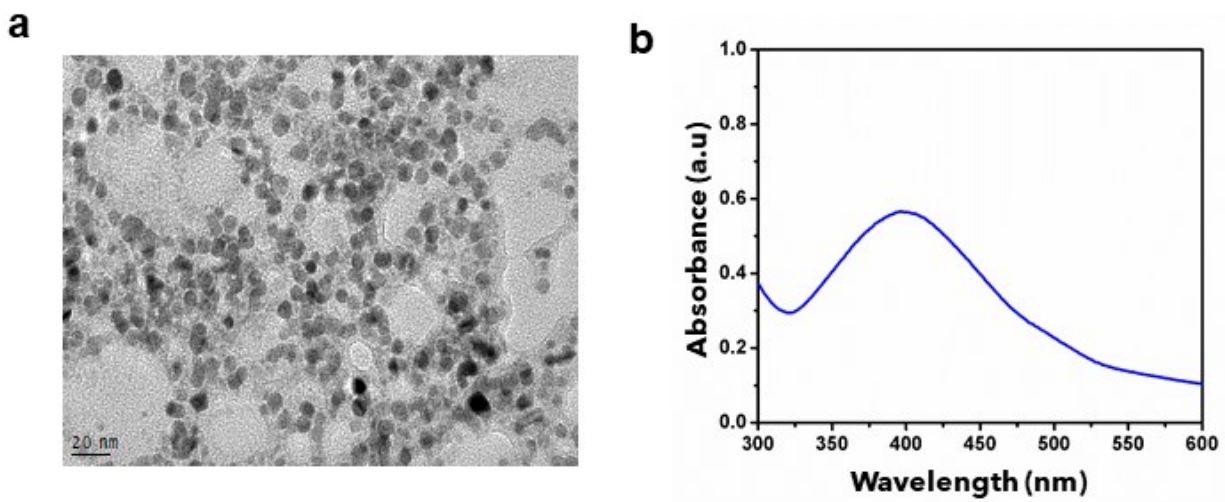

**Figure S1. (a) TEM of AgNP solution (b) UV of nanoparticle solution**

TEM images revealed that AgNP has spherical morphology. The average particle sizes of AgNP particles were  $11 \pm 0.95$  nm respectively. The hydrodynamic diameter of the particle was  $12 \pm 3$  nm, in agreement with TEM analysis. The maximum absorption peaks of AgNP solution was at 400 nm.

**Table S1.** List of melting temperature of PCL, pPCL, pPCL-Ag6, pPCL-Ag24

| <b>Sample</b>    | <b>Melting temperature, T<sub>m</sub><br/>(°C)</b> | <b>Crystallisation temperature, T<sub>c</sub><br/>(°C)</b> |
|------------------|----------------------------------------------------|------------------------------------------------------------|
| <b>PCL</b>       | 62.92                                              | 39.74                                                      |
| <b>pPCL</b>      | 64.33                                              | 40.47                                                      |
| <b>pPCL-Ag6</b>  | 63.13                                              | 40.15                                                      |
| <b>pPCL-Ag24</b> | 64.09                                              | 40.32                                                      |
